# Supplementary material
Source: PubMed Central journal article supplement (PMC5620126)

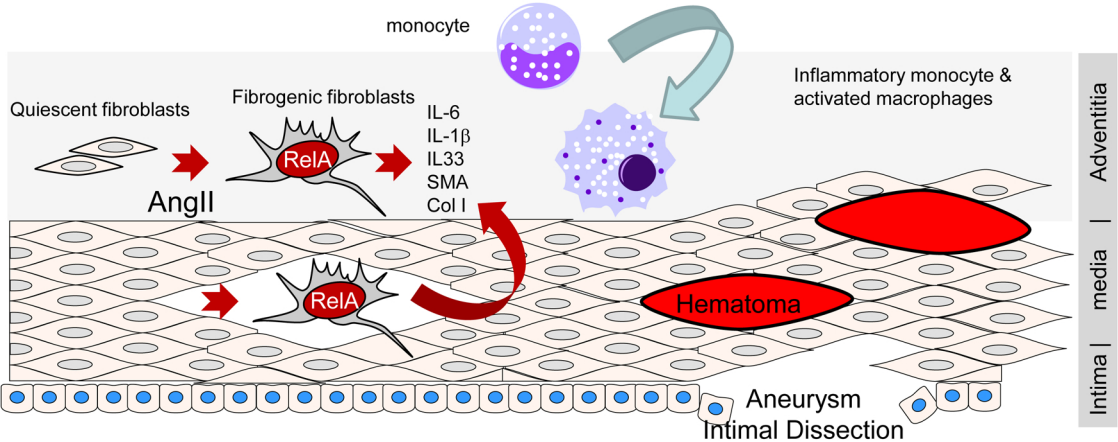

Supplement: NIHMS898962-supplement-Graphic_Abstract.pdf [file NIHMS898962-supplement-Graphic_Abstract.pdf]
